# Supplementary material for: The Impact of the COVID-19 Pandemic on Food Distribution at Emergency Food Assistance Organizations in the Southwestern United States: A Qualitative Investigation
Source: MDPI journal article supplement (doi:10.3390/nu13124267), 2021-11-26
Supplement: s1 [file s1]

**The impact of COVID-19 pandemic on food distribution at emergency food assistance organizations in the Southwestern United States: A qualitative investigation**

---

**Table S1.** Interview questions.

---

1. The COVID-19 pandemic has changed our lives and have impacted our daily activities. Please tell us if your organization ever shut down shut down? If yes...
    - A. For how long?
    - B. When did it re-open?
    - C. What were some of the challenges, if any, that you experienced during re-opening of the pantry?
- 
2. How would you describe the current operation of your organization?
    - A. What, if any, safety guidelines/procedures are you following for employees, volunteers and clients?
      - i. For overall operations
      - ii. For food distribution
      - iii. For food procurement
      - iv. For other services
    - B. How, if at all, are these guidelines/procedures different from before COVID-19?
    - C. How many days in a week is the pantry open?
      - i. For overall operations
        - a. Change in the number of days due to COVID-19
        - b. Change in the number of hours per day
      - ii. For food distribution
        - a. Change in the number of days due to COVID-19
        - b. Change in the number of hours per day
    - D. How many staff are present at the pantry?
      - i. For overall operations
        - a. How has this changed, if at all?
          - 1) Number of staff
        - b. Type of staff
          - 1) Employees
          - 2) Volunteers
          - 3) Others
      - ii. For food distribution
        - a. How has this changed, if at all?
          - 1) Number of staff
        - b. Type of staff

- 1) Employees
- 2) Volunteers
- 3) Others

E. Considering all that has happened over the past 7 months, what factors, if any, affect your current overall operations?

- i. Funding
- ii. Food donations
- iii. Availability of staff (employees/volunteers)
- iv. Food waste
- v. Expenses towards preventive measures for COVID-19 (masks, gloves, cleaning supplies, etc.)
- vi. Other

3. How would you describe the current food distribution process?

A. How, if at all, is the current food distribution process different than prior to COVID-19?

B. What are the most common foods currently distributed?

- i. What are the contents of a typical food package?
  - a. Type/variety
  - b. Amount
- ii. What, if any, are the differences in the foods distributed currently and prior to COVID-19?
  - a. Type/variety
  - b. Perishable/non-perishable
  - c. Amount
  - d. Frequency of clients receiving foods
  - e. Why have these changes been necessary?

C. Considering all that has happened over the past 7 months, what factors, if any, affect your current food distribution process?

- i. Funding
- ii. Availability of staff (employees/volunteers)
- iii. Food waste
- iv. Food distribution time
- v. Other
